# Supplementary material for: Antifungal effects of eugenol on Candida albicans adherence to denture polymers
Source: PeerJ. 2023 Aug 16;11:e15750. doi: 10.7717/peerj.15750 (PMC10439715; doi:10.7717/peerj.15750)
Supplement: File S1 [file peerj-11-15750-s001.xlsx]

## Sheet: Table 1
denturebase	Denture base	polident	steradent	eugenol3	eugenol10	SdH2O
1	impact baseline	2110	1760	1880	1850	2210
2	impact baseline	2000	2010	1940	2030	2130
3	impact baseline	2340	1850	2130	2150	1980
4	impact	20	120	10	10	1990
5	impact	10	50	0	0	1870
6	impact	0	0	0	0	2200
7	impact	50	10	0	0	2040
8	impact	0	10	0	0	2350
9	impact	60	10	20	0	1860
10	impact	0	0	0	0	2010
11	impact	10	0	0	10	2100
12	impact	220	10	10	0	2310
13	lucitone baseline	2430	1960	2730	2620	2670
14	lucitone baseline	2140	2130	2670	2410	2370
15	lucitone baseline	2260	2330	2580	2540	2430
16	lucitone	10	0	10	0	2200
17	lucitone	30	0	0	0	2560
18	lucitone	10	30	20	0	2230
19	lucitone	10	0	10	10	2210
20	lucitone	20	20	0	0	2360
21	lucitone	10	10	10	0	2580
22	lucitone	0	0	0	0	2380
23	lucitone	20	0	10	0	2010
24	lucitone	0	20	0	0	1940
25	eclipse baseline	2650	1700	2080	1430	2590
26	eclipse baseline	2830	1650	2260	1610	2280
27	eclipse baseline	2770	1840	2150	1730	2350
28	eclipse	20	20	0	0	2670
29	eclipse	50	30	0	0	2560
30	eclipse	10	40	10	0	1990
31	eclipse	10	130	0	0	2110
32	eclipse	0	10	0	0	2350
33	eclipse	70	30	10	10	2670
34	eclipse	20	80	0	0	2340
35	eclipse	0	10	0	10	1670
36	eclipse	10	10	10	0	1890
37	kooliner baseline	1840	1820	2810	2610	1990
38	kooliner baseline	1960	2010	2650	2530	2240
39	kooliner baseline	1770	1940	2770	2690	2370
40	kooliner	10	310	10	0	2710
41	kooliner	30	10	0	0	2170
42	kooliner	10	0	10	0	2340
43	kooliner	10	0	10	0	2640
44	kooliner	10	10	0	40	1740
45	kooliner	10	0	0	0	2580
46	kooliner	10	0	20	0	2270
47	kooliner	0	0	0	20	1970
48	kooliner	20	10	0	0	1830
49	tokuyama baseline	1830	1930	2480	1660	2210
50	tokuyama baseline	1970	2060	2090	1800	2450
51	tokuyama baseline	2110	2190	2370	2010	1990
52	tokuyama	10	340	10	0	1680
53	tokuyama	110	170	10	0	1830
54	tokuyama	120	70	10	0	1960
55	tokuyama	60	170	0	0	2230
56	tokuyama	10	0	0	0	2180
57	tokuyama	10	10	0	10	2450
58	tokuyama	30	70	20	0	1930
59	tokuyama	10	190	0	0	2030
60	tokuyama	20	120	10	0	2380
61		.	.	.	.	.
62		.	.	.	.	.
63		.	.	.	.	.
64		.	.	.	.	.
65		.	.	.	.	.
66		.	.	.	.	.
